# Supplementary material for: Cyclam-based dendrimers as ligands for lanthanide ions
Source: Royal Society of Chemistry journal article supplement (doi:10.1039/b403664f), 2004-01-01
Supplement: b403664f.doc [file b403664f.doc]

**Cyclam-based Dendrimers as Ligands for Lanthanide Ions**

Christophe Saudan,a Paola Ceroni,a Veronica Vicinelli,a Mauro Maestri,*a Vincenzo Balzani,*a Marius Gorka,b Sang-Kyu Lee,b Jeroen van Heyst,b Fritz Vögtle*b

a Dipartimento di Chimica "G. Ciamician", Università di Bologna, via Selmi 2, I-40126 Bologna, Italy Fax: +39 051 2099456; Tel: +39 051 2099560; E-mail: vincenzo.balzani@unibo.it

b Kekulé-Institut für Organische Chemie und Biochemie der Universität Bonn, Gerhard-Domagk Strasse 1, D-53121 Bonn, Germany. Fax: +49 228 735662; Tel: +49 228 733495; E-mail: voegtle@uni-bonn.de

*
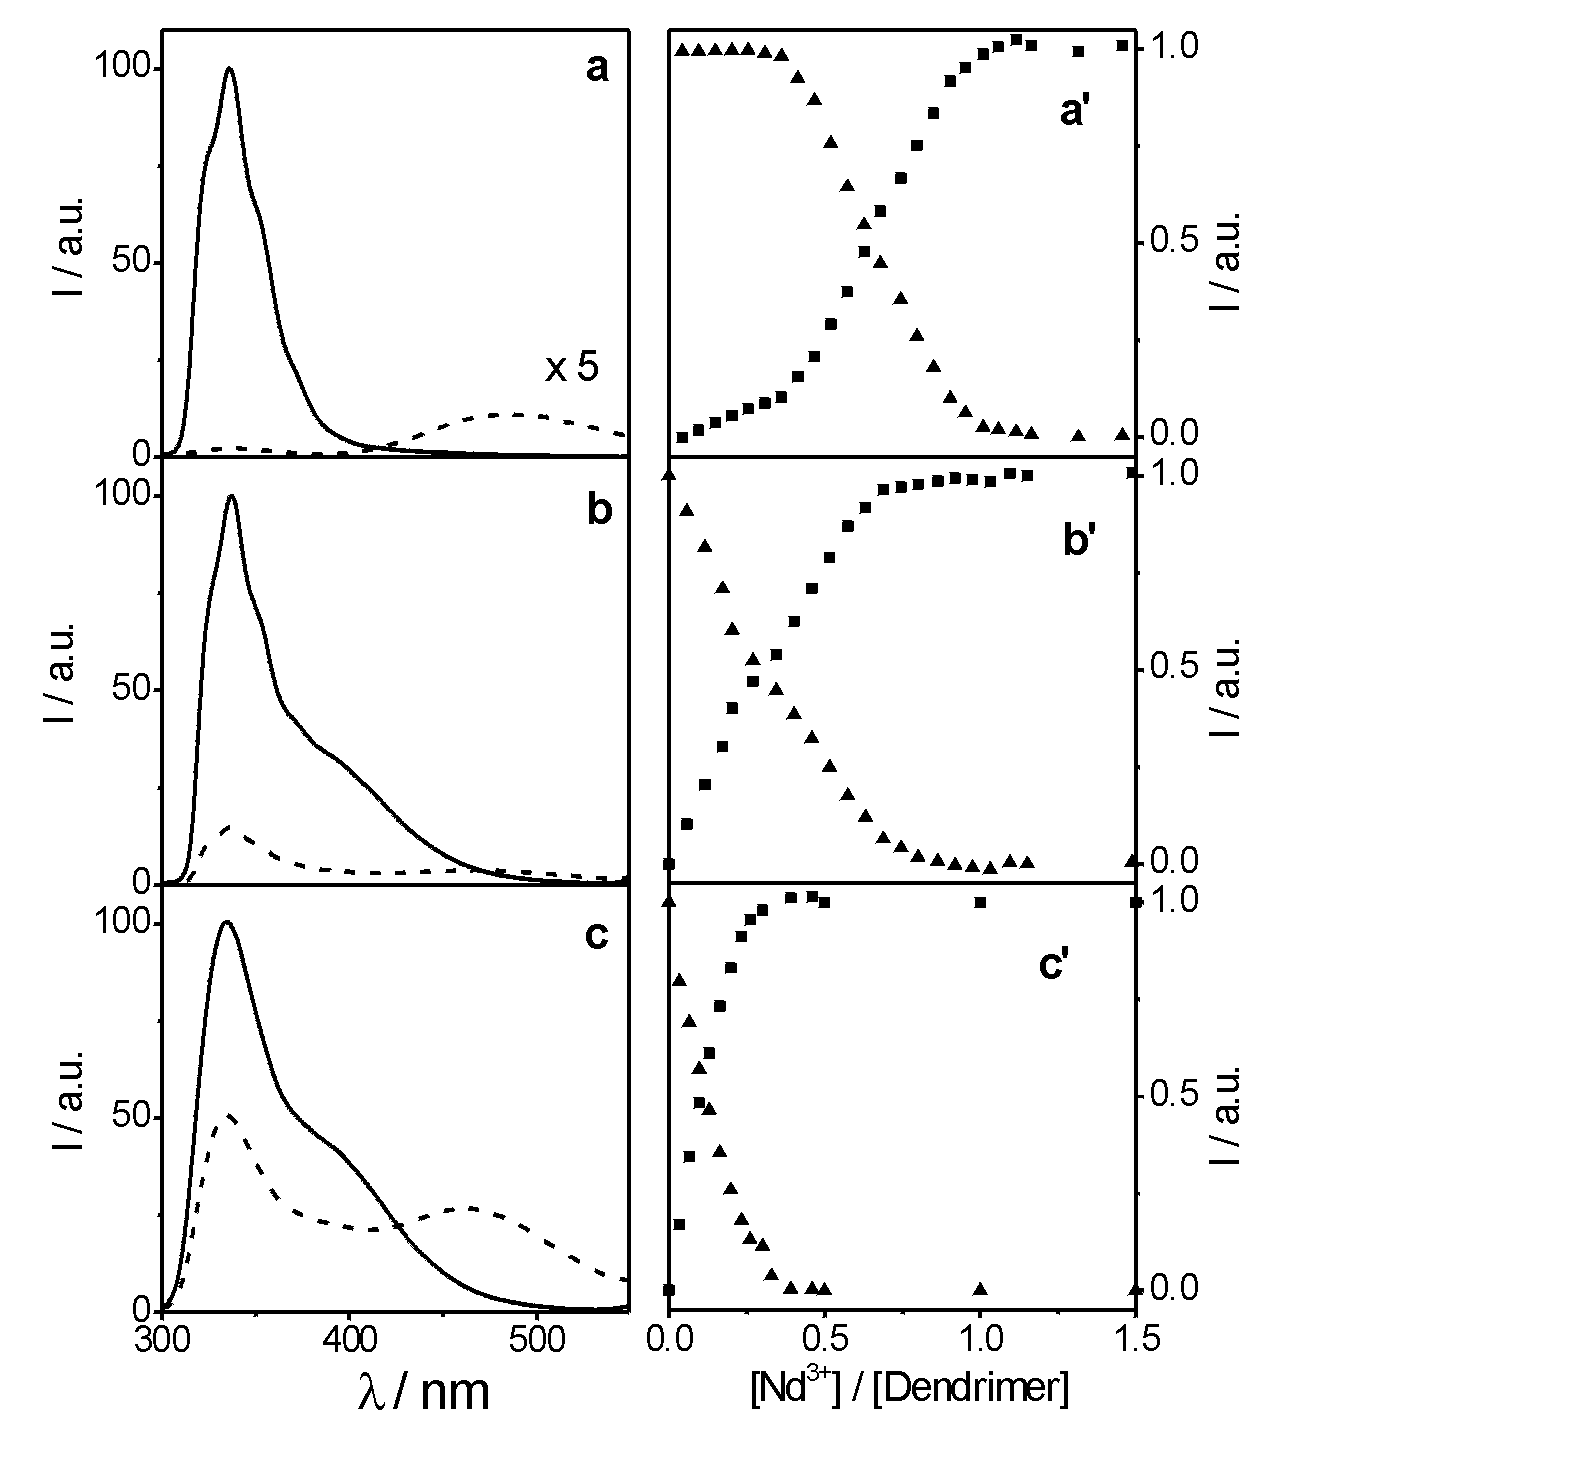
*

Panels (a), (b) and (c) show respectively the luminescence spectrum of **1** (3.40  10-5 M) , **2** (1.30  10-5 M) and **3** (6.6  10-6 M), before (dashed line) and after (full line) addition of a stoichiometric amount of Nd(CF3SO3)3 in CH3CN-CH2Cl2 1:1 v/v at 298 K with exc = 275 nm. The normalized fluorescence intensity changes observed upon titration of **1**, **2** and **3** with Nd(CF3SO3)3 are depicted in panels (a’), (b’) and (c’), respectively (■, 337 nm; ▲, 480 nm).
